# Supplementary material for: Technical note: sea salt interference with black carbon quantificationin snow samples using the single particle soot photometer
Source: Copernicus journal article supplement (doi:10.5194/acp-2021-182), 2021-03-10
Supplement: Supplementary file 1 [file acp-2021-182-supplement.pdf]

Supplementary material

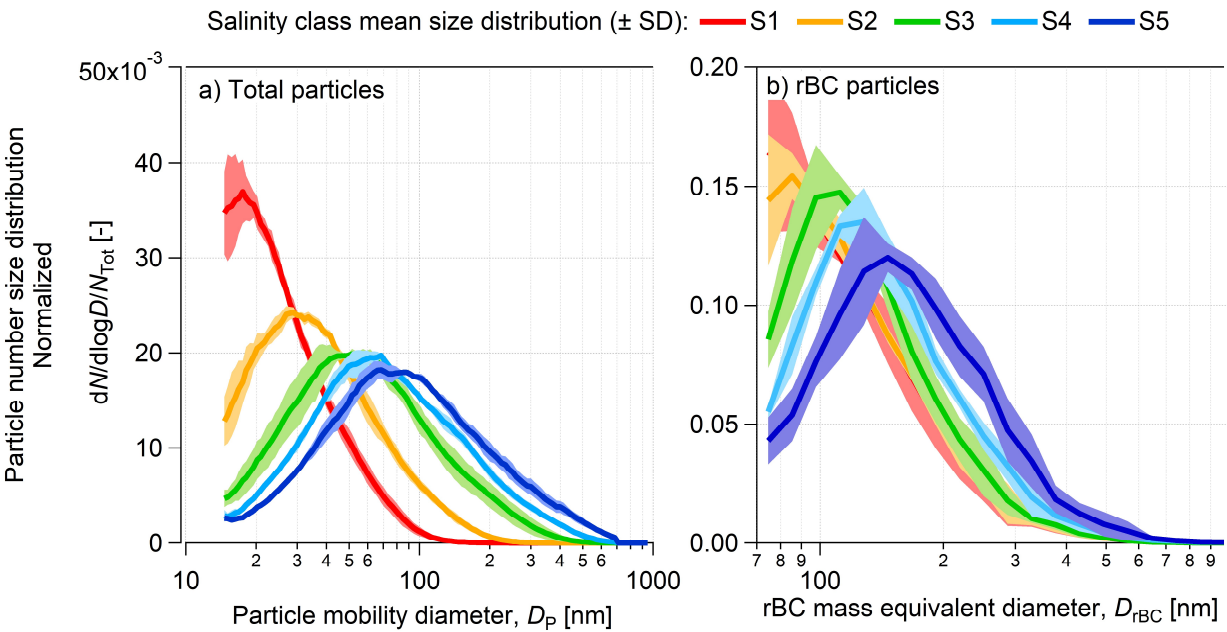

Figure S1 Normalized size distribution of total (a) and rBC particles (b) aerosolized from PASCAL snow samples grouped in salinity classes. Total particles measured with the SPMS in the 14-680 nm diameter range nm . rBC particles measure with the SP2 in the 70-1000 nm diameter range.

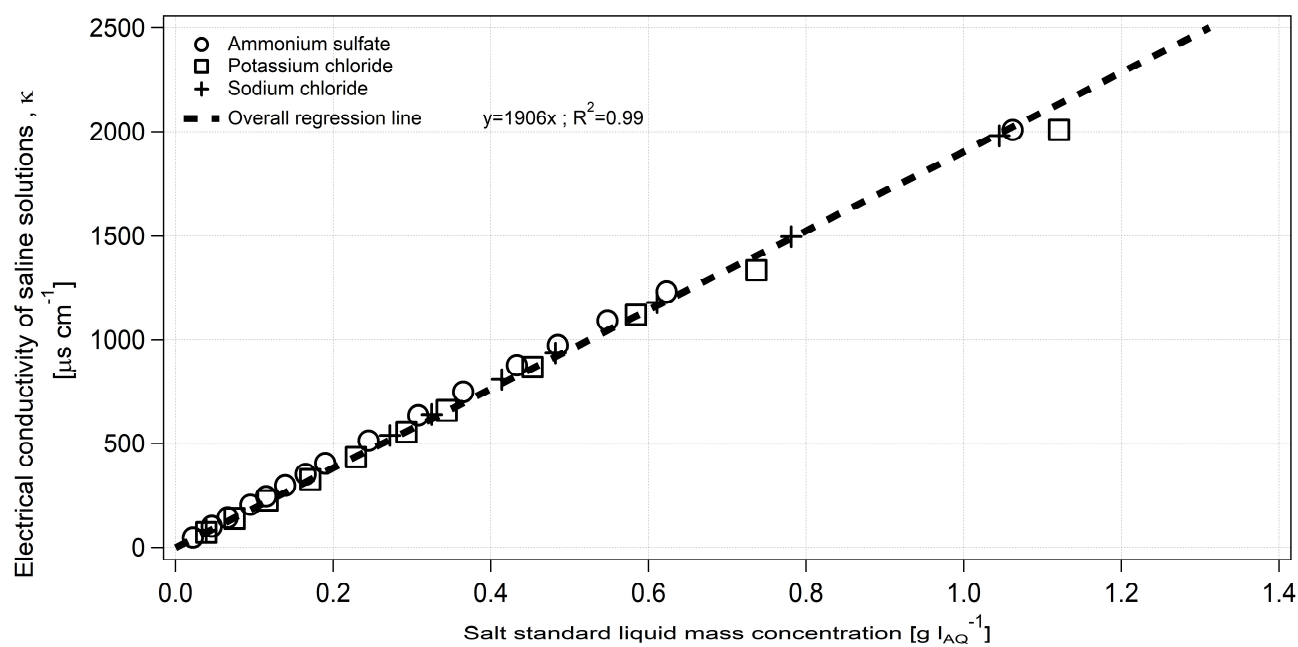

**Figure S2** Electrical conductivity of saline solutions as function of salt liquid mass concentration. Electrical conductivity measured between 22 and 23°C.

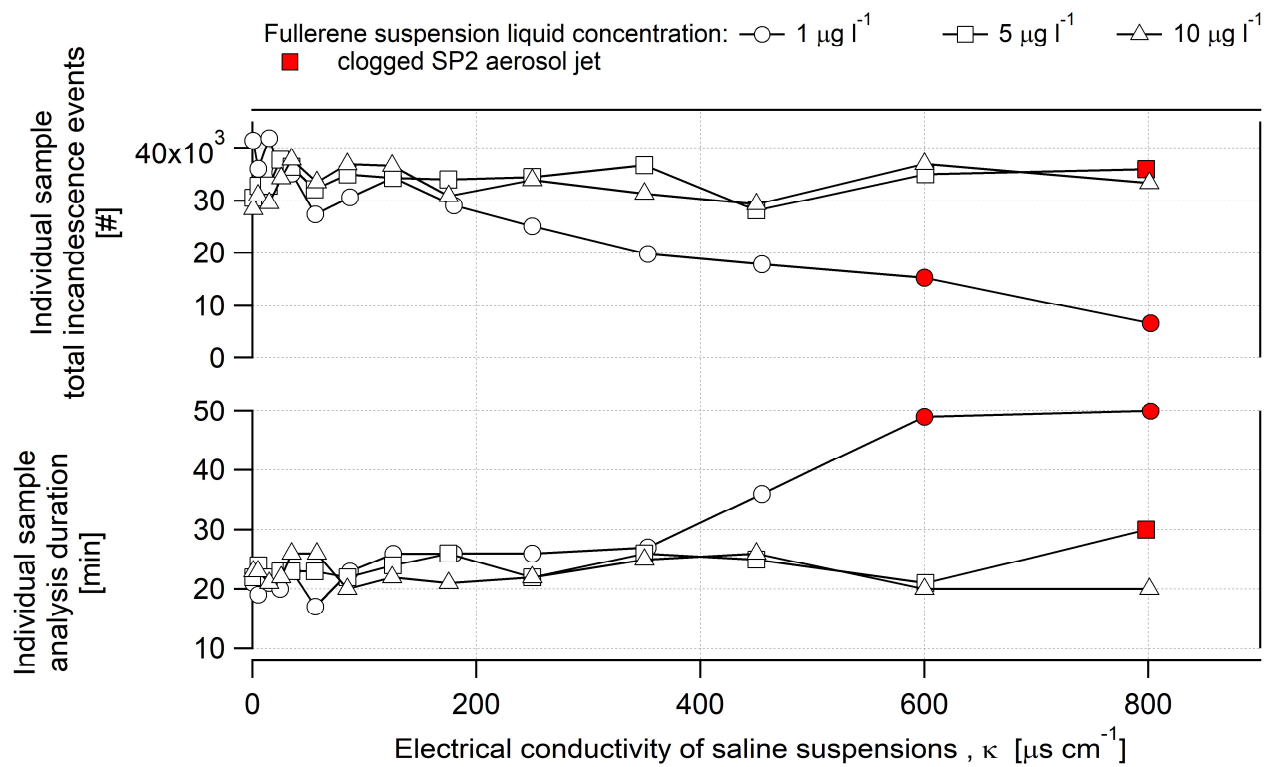

**Figure S3** Total incandescence events and analysis duration of fullerene soot suspensions at different concentration and in increasing electrical conductivity.

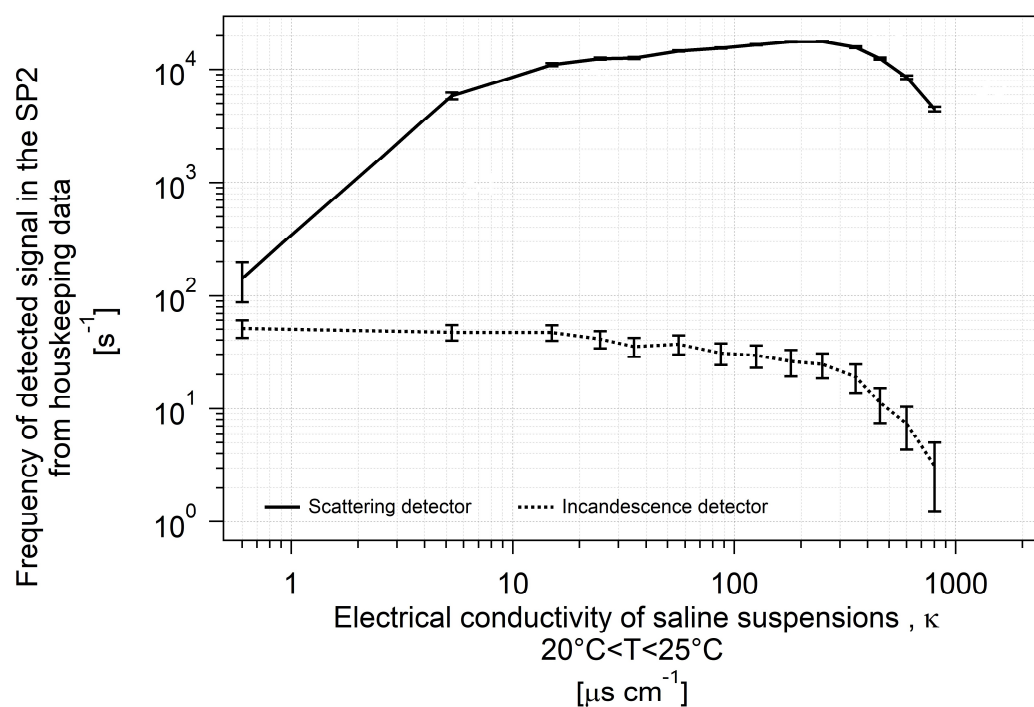

Figure S4 Frequency of detected scattering and incandescence signal in the SP2 recorded in the housekeeping data during the analysis of fullerene soot suspension ( $10 \mu\text{g l}^{-1}$ ) with increasing NaCl concentration. Signal acquisition triggered over the scattering detector.

25



Electrical conductivity of fullerene suspension,  $\kappa$  [ $\mu\text{S cm}^{-1}$ ]: — 0 — 50 — 100 — 200 — 400 — 600 — 800  
 Fullerene suspension mass concentration:  $10 \mu\text{g l}^{-1}$

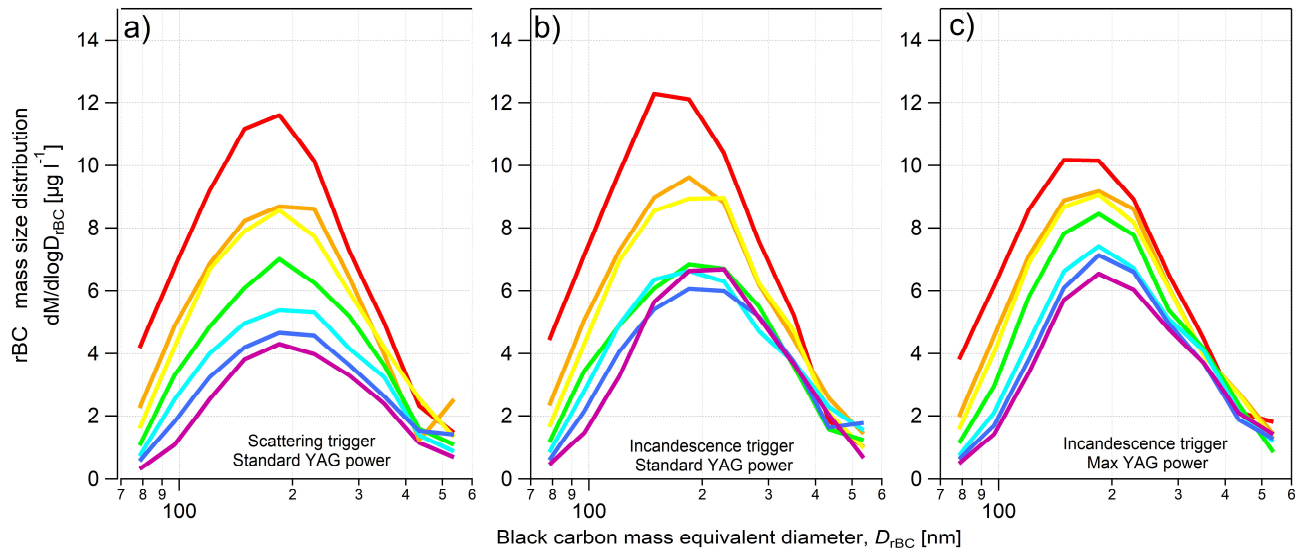

**Figure S5** rBC mass size distribution for different SP2 settings. a) acquisition triggered on the scattering detector with standard YAG-laser output power,  $\epsilon_{\text{SP2-Tsc}}$ ; b) acquisition triggered on the incandescence detector with standard YAG-laser output power  $\epsilon_{\text{SP2-Tin}}$ ; c) acquisition triggered on the incandescence detector with maximum YAG-laser output power,  $\epsilon_{\text{SP2-Ymax}}$ . Results for fullerene soot suspensions with a concentration of  $10 \mu\text{g l}^{-1}$ .

**Table S1** Theoretical coating thickness of BC particles suspended from saline suspensions at increasing electrical conductivity ( $\kappa$ ) calculated assuming: concentric core-shell geometry, single BC particle containing droplet, droplet diameter ( $D_D$ ) of  $5 \mu\text{m}$ ,  $8 \mu\text{m}$  and  $12 \mu\text{m}$ .

| $\kappa$<br>[ $\mu\text{S cm}^{-1}$ ] | Coating thickness [nm] |                       |                        |                       |                       |                        |                       |                       |                        |                       |                       |                        |                       |                       |                        |
|---------------------------------------|------------------------|-----------------------|------------------------|-----------------------|-----------------------|------------------------|-----------------------|-----------------------|------------------------|-----------------------|-----------------------|------------------------|-----------------------|-----------------------|------------------------|
|                                       | $D_{rBC}$ 100 nm       |                       |                        | $D_{rBC}$ 200 nm      |                       |                        | $D_{rBC}$ 300 nm      |                       |                        | $D_{rBC}$ 400 nm      |                       |                        | $D_{rBC}$ 500 nm      |                       |                        |
|                                       | $D_D$ 5 $\mu\text{m}$  | $D_D$ 8 $\mu\text{m}$ | $D_D$ 12 $\mu\text{m}$ | $D_D$ 5 $\mu\text{m}$ | $D_D$ 8 $\mu\text{m}$ | $D_D$ 12 $\mu\text{m}$ | $D_D$ 5 $\mu\text{m}$ | $D_D$ 8 $\mu\text{m}$ | $D_D$ 12 $\mu\text{m}$ | $D_D$ 5 $\mu\text{m}$ | $D_D$ 8 $\mu\text{m}$ | $D_D$ 12 $\mu\text{m}$ | $D_D$ 5 $\mu\text{m}$ | $D_D$ 8 $\mu\text{m}$ | $D_D$ 12 $\mu\text{m}$ |
| 0                                     | 0                      | 0                     | 0                      | 0                     | 0                     | 0                      | 0                     | 0                     | 0                      | 0                     | 0                     | 0                      | 0                     | 0                     | 0                      |
| 50                                    | 18                     | 47                    | 90                     | 6                     | 21                    | 54                     | 3                     | 11                    | 32                     | 2                     | 6                     | 20                     | 1                     | 4                     | 13                     |
| 100                                   | 30                     | 69                    | 125                    | 11                    | 37                    | 84                     | 5                     | 20                    | 55                     | 3                     | 12                    | 37                     | 2                     | 8                     | 25                     |
| 200                                   | 46                     | 98                    | 170                    | 21                    | 60                    | 126                    | 10                    | 36                    | 90                     | 6                     | 23                    | 64                     | 4                     | 16                    | 47                     |
| 400                                   | 68                     | 135                   | 226                    | 36                    | 93                    | 180                    | 20                    | 62                    | 140                    | 12                    | 42                    | 107                    | 8                     | 30                    | 82                     |
| 600                                   | 84                     | 161                   | 266                    | 49                    | 118                   | 219                    | 28                    | 83                    | 177                    | 17                    | 59                    | 141                    | 12                    | 42                    | 111                    |
| 800                                   | 97                     | 182                   | 298                    | 59                    | 138                   | 250                    | 36                    | 101                   | 207                    | 23                    | 73                    | 168                    | 15                    | 54                    | 136                    |
